# Supplementary material for: A dual responsive ionic liquid-based polymeric hydrogel: a promising drug delivery vehicle for the treatment of breast cancer
Source: Royal Society of Chemistry journal article supplement (doi:10.1039/d3nj01914d), 2023-01-01
Supplement: d3nj01914d1.pdf [file d3nj01914d1.pdf]

## Supporting Information

### Dual Responsive Ionic Liquid-Based Polymeric Hydrogel: A Promising Drug Delivery Vehicle for the Treatment of Breast Cancer

Raviraj Pansuriya<sup>a</sup>, Tapas Patel<sup>a</sup>, Sanjay Mehra<sup>b,c</sup>, Arvind Kumar<sup>b,c</sup>, Omar A. El Seoud<sup>d</sup>,  
Sugam Kumar<sup>e</sup>, Vinod K Aswal<sup>e</sup>, Suresh Kumar Kailasa<sup>a</sup>, Naved I. Malek<sup>a,d\*</sup>

<sup>a</sup>Ionic Liquids Research laboratory, Department of Chemistry, Sardar Vallabhbhai National Institute of Technology, Surat- 395007, Gujarat, India.

<sup>b</sup>Academy of Scientific and Innovative Research (AcSIR), Ghaziabad-201002, Uttar Pradesh, India.

<sup>c</sup>Salt and Marine Chemicals Division, CSIR-Central Salt and Marine Chemicals Research Institute, Council of Scientific and Industrial Research, G. B. Marg, Bhavnagar, 364002, Gujarat, India

<sup>d</sup>Institute of Chemistry, University of São Paulo, 05508-000 São Paulo, SP, Brazil

<sup>e</sup>Solid State Physics Division, Bhabha Atomic Research Centre, Trombay, Mumbai-400085, India

Corresponding Author e-mail: [navedmalek@chem.svnit.ac.in](mailto:navedmalek@chem.svnit.ac.in)

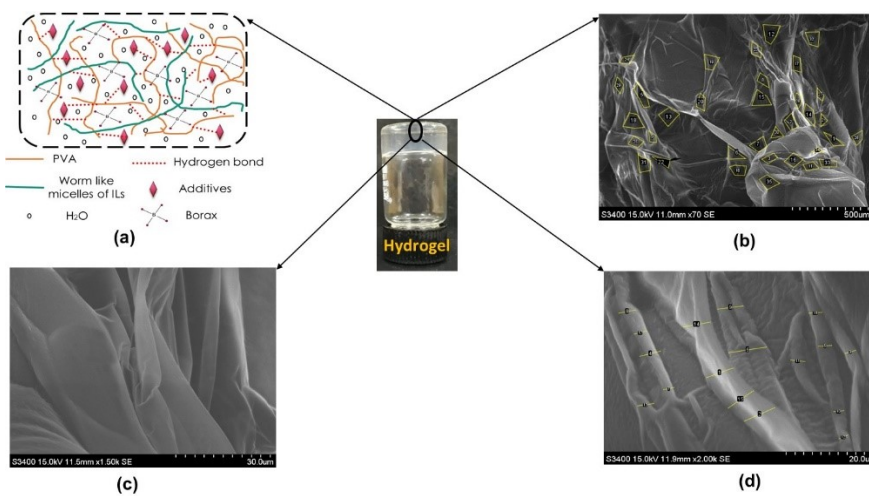

**Figure S1:** Morphology of hydrogel through SEM images where (a) Schematic representation of the fiber and pores like structure; (b and c) pores within the fibrous matrix; (d) fibers network within the hydrogel.

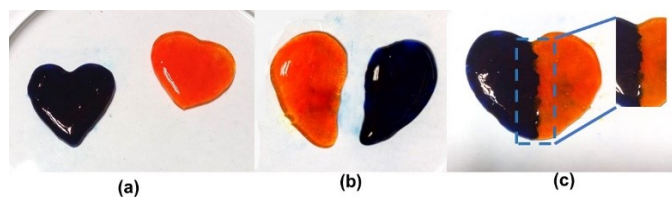

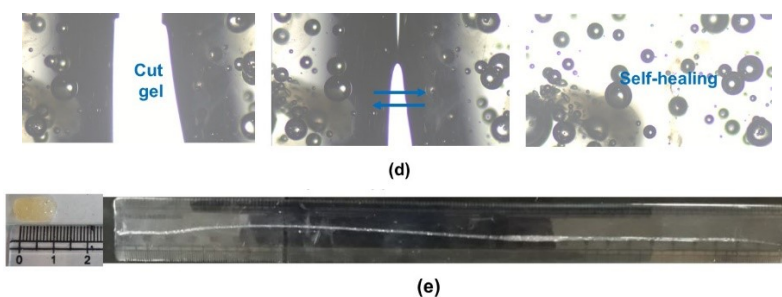

**Figure S2:** Self-healing property of hydrogel (a) dye contain hydrogel; (b) cut hydrogel with different dye; (c) self-healing of hydrogel; (d) inverted microscopic image of self-healing of hydrogel; (e) Stretchability of the hydrogel.

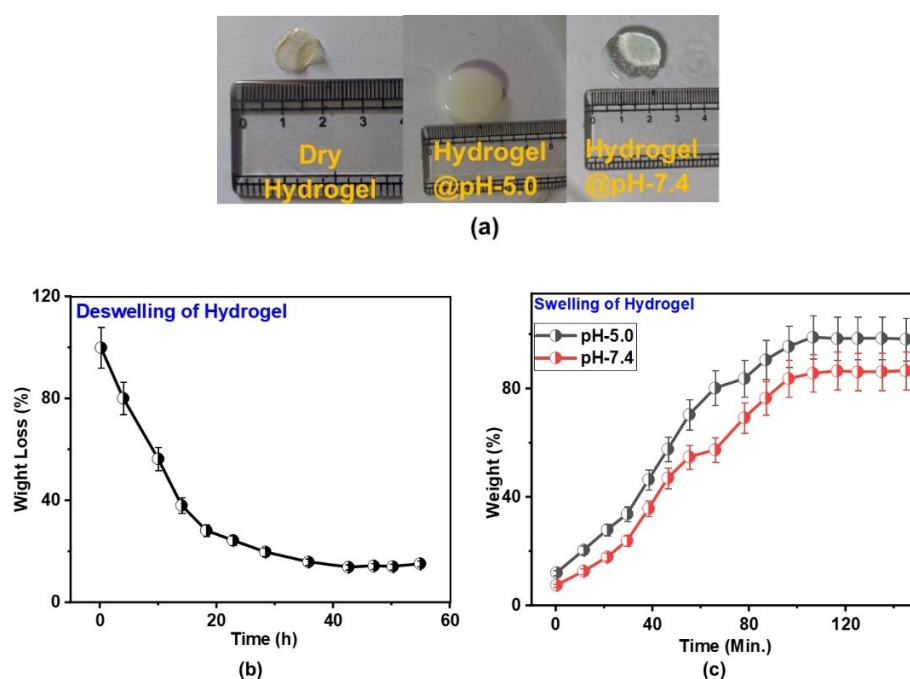

**Figure S3:** (a) Photos of Dry hydrogel, swelling in 5.0 and 7.4 pH buffer solution, respectively; (b) deswelling of hydrogel; (c) Swelling of hydrogel at 5.0 and 7.4 pH.

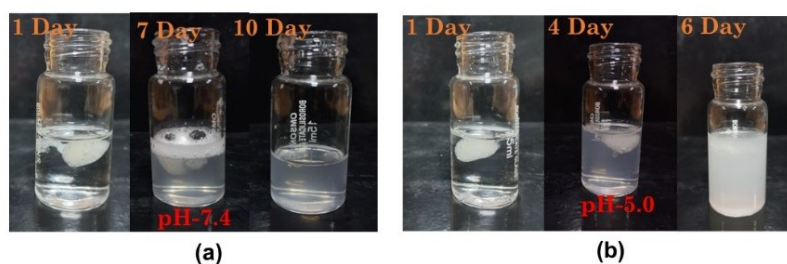

**Figure S4:** Degradation of hydrogel in PBS with (a) 7.4 pH and (b) 5.0 pH.

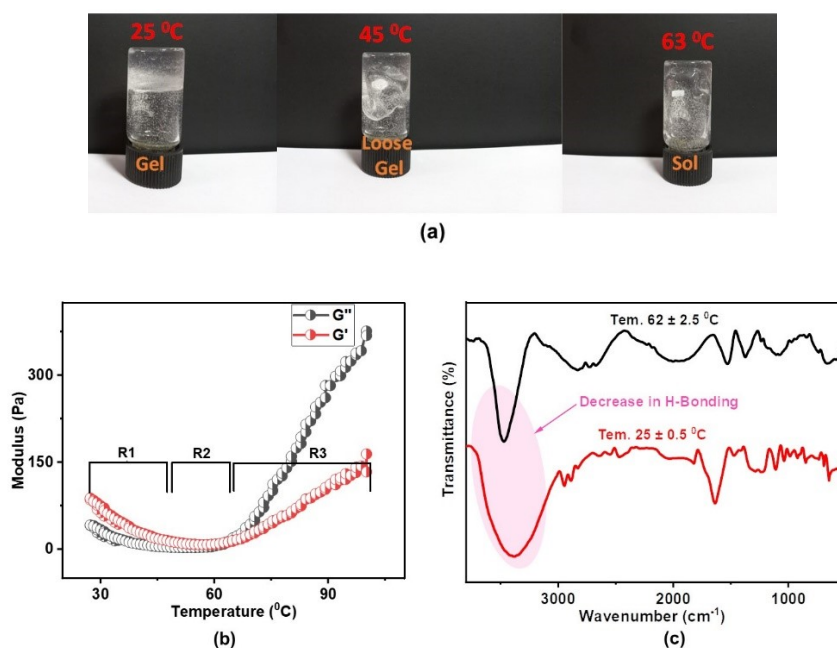

**Figure S5:** Gel-sol Transition (a) Image of gel-sol transition in tube inversion method (b) Shown Modulus Vs Temperature graph of hydrogel; (c) Shown FTIR spectra of Hydrogel at 25 ± 2.5 °C (**Red line**) and 62 ± 3.5 °C (**Black line**).

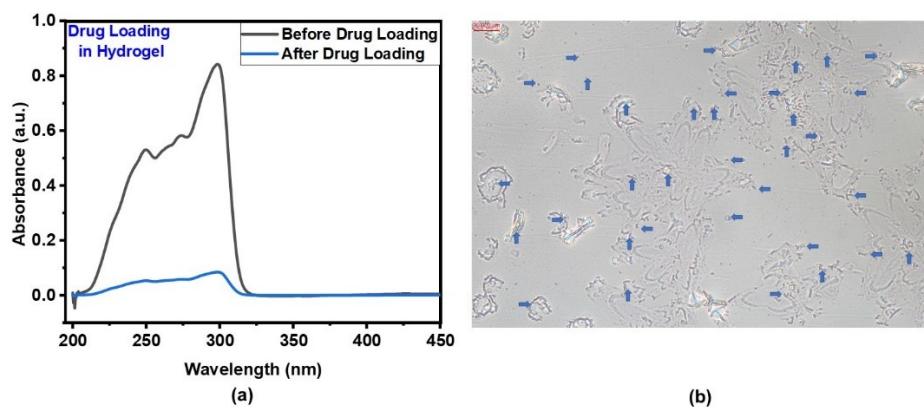

**Figure S6:** (a) Absorbance measurement of hydrogel before and after loading of 5-FU; (b) Inverted microscopic images of 5-FU loaded hydrogel.

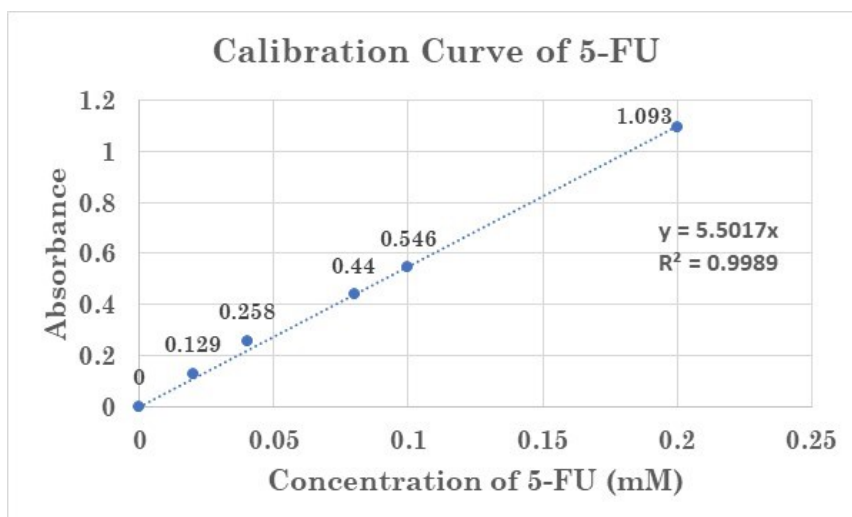

**Figure S7:** Calibration curve of 5-FU.

**Table S1:** In vitro drug release data that are fitted into different kinetic models.

| Order                 | r <sup>2</sup> @ pH-5 |        | r <sup>2</sup> @ pH-7.4 |        |
|-----------------------|-----------------------|--------|-------------------------|--------|
|                       | 25 °C                 | 37 °C  | 25 °C                   | 37 °C  |
| <i>Zero order</i>     | 0.9422                | 0.9088 | 0.9577                  | 0.9824 |
| <i>First Order</i>    | 0.8658                | 0.7232 | 0.9516                  | 0.8879 |
| <i>Higuchi</i>        | 0.9770                | 0.9563 | 0.9636                  | 0.9959 |
| <i>Hixson Crowell</i> | 0.8951                | 0.8605 | 0.9611                  | 0.9290 |
